# Supplementary material
Source: PubMed Central journal article supplement (PMC9691619)
Supplement: NIHMS1837527-supplement-1.pdf [file NIHMS1837527-supplement-1.pdf]

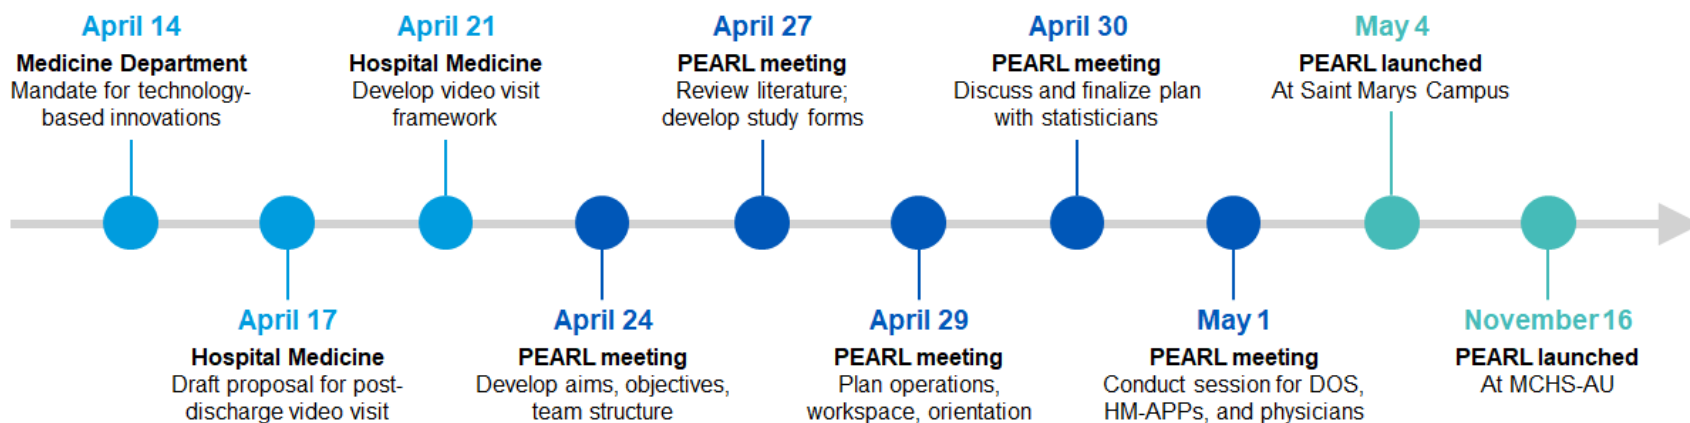

Supplementary Figure 1: Timeline for Development of the PEARL Initiative.

PEARL was developed from April 14, 2020–May 3, 2020 and launched on May 4, 2020 (Saint Marys Campus) and on November 16 (MCHS-AU).

Abbreviations: HM-APP: Hospital Medicine Advanced Practice Provider; DOS: Desk Operations Specialist; MCHS-AU: Mayo Clinic Health System-Austin; PEARL: Post-Discharge Early Assessment with Remote video Link.

Used with permission of Mayo Foundation for Medical Education and Research, all rights reserved.

## Supplement 1: Sample Script for Video visit on New Medications or Changes to Existing Medications

### **Introduce yourself**

Good morning/afternoon Mr. /Mrs. \*\*\*. My name is \*\*\*, calling from Mayo Clinic Hospital Internal Medicine team. You were recently discharged by my colleagues from Medicine \*\*\*.

During this video call, I would like to talk about how things have been since you left the hospital. I would like to ask about your medications, monitoring your health at home, and home supports. This call will take 15–20 minutes. Would it be OK to start?

### **Background**

How have you been doing since you left the hospital on \*\*\*

### **Question 1: New medications or changes to existing medications**

*(Instruction to Interviewer: Please identify new medications or changes to medications from the After Visit Summary/Discharge Summary. If no new medications/changes to medications, then skip to Question 2)*

I would like to ask about new medications prescribed before you left the hospital.

#### **Question 1A.** Do you remember the new medications prescribed?

*(Instruction to Interviewer: If patient does not remember the medication or indication for the new medications, then review the medications, their indications, and stress the importance of taking them)*

#### **Question 1B.** Have you been taking the new medications?

*(Instruction to Interviewer: If patient has not been taking the new medications, then have a discussion with the patient to explore reasons)*

#### **Question 1C.** What is the reason you have not been able to take the new medications?

*(Instruction to Interviewer: Opportunity to intervene and fix the barrier. If the patient's caregiver is also on the call, they can be included in the discussion to emphasize the importance of taking medications).*

#### **Question 1D.** Let us review changes to medications you were previously taking

*(Instruction to Interviewer: If patient does not remember changes to the medications or reasons for the change, then review the medications, their indications, and stress the importance of taking them)*

#### **Question 1E.** Have you had concerns or side effects from your medications?

#### **Question 1F.** Have you had concerns about affording your medications?

#### **Question 1G.** Do you feel comfortable to manage your medications or do you need help?

## Supplement 2: Patient Survey

1. Was it easy to get connected to the video call?
  - Agree
  - Neutral
  - Disagree
  
2. Did you understand your provider during the video call?
  - Agree
  - Neutral
  - Disagree
  
3. Did you feel that your provider easily understood you during the video call?
  - Agree
  - Neutral
  - Disagree
  
4. Did you benefit from the video call?
  - Agree
  - Neutral
  - Disagree
  
5. Are you interested in receiving video calls in future?
  - Agree
  - Neutral
  - Disagree
  
6. Do you prefer video visits over clinic visits?
  - Agree
  - Neutral
  - Disagree
  
7. Would you recommend video visits to other friends or family?
  - Agree
  - Neutral
  - Disagree
  
8. Compared to a traditional in-person appointment, did a video visit make you feel less connected to your provider?
  - Agree
  - Neutral
  - Disagree

### Supplement 3: Hospital Medicine Advanced Practice Provider (HM-APP) Survey

Select your age group

- 20 yrs to <30 years
- 30 yrs to <40 years
- 40 yrs to <50 years
- 50 yrs to <60 years
- 60 yrs to <70 years

Select your gender

- Male
- Female
- Non-binary/other
- Prefer not to respond

Select your current role

- Nurse Practitioner (NP)
- Physician Assistant (PA)

Select the number of years worked as a NP or PA

- 0 yr to 5 yrs
- 6 yrs to 10 yrs
- 11 yrs to 15 yrs
- 16 yrs to 20 yrs
- >20 yrs

How many PEARL shifts have you completed?

- 1 to 5
- 6 to 10
- 11 to 15
- 16 to 20
- >20

How many Zoom video visits have you completed?

- 1 to 5
- 6 to 10
- 11 to 15
- 16 to 20
- >20

### **Interpersonal Communication**

1. I was engaged with the patient during the video visit

- Strongly disagree
- Disagree
- Neutral
- Agree

- Strongly agree

2. Patients were engaged during the video visit

- Strongly disagree
- Disagree
- Neutral
- Agree
- Strongly agree

3. I benefitted from visual contact with the patient(s)

- Strongly disagree
- Disagree
- Neutral
- Agree
- Strongly agree

4. The video visits felt as personal as in-person visits

- Strongly disagree
- Disagree
- Neutral
- Agree
- Strongly agree

**Technical Quality of Care**

1. Patient privacy was protected

- Strongly disagree
- Disagree
- Neutral
- Agree
- Strongly agree

2. I was able to discuss the patient's discharge plan

- Strongly disagree
- Disagree
- Neutral
- Agree
- Strongly agree

3. The video visit was a valuable addition to the patient's care

- Strongly disagree
- Disagree
- Neutral
- Agree
- Strongly agree

5. I provided value and input into the patient's discharge plan

- Strongly disagree
- Disagree
- Neutral
- Agree
- Strongly agree

6. Time for the video visit was sufficient

- Strongly disagree
- Disagree
- Neutral
- Agree
- Strongly agree

**Efficacy**

1. Video visits can increase patients' access to care

- Strongly disagree
- Disagree
- Neutral
- Agree
- Strongly agree

2. Video visits can decrease frequency of emergency department visits

- Strongly disagree
- Disagree
- Neutral
- Agree
- Strongly agree

3. Video visits can decrease patients' length of stay

- Strongly disagree
- Disagree
- Neutral
- Agree
- Strongly agree

4. Video visits can decrease hospital readmission rates

- Strongly disagree
- Disagree
- Neutral
- Agree
- Strongly agree

5. Video visits can provide ease of mind to patients and caregivers

- Strongly disagree
- Disagree
- Neutral

- Agree
- Strongly agree

### **Technology**

1. Equipment (i.e. computer) for the video visits was easy for me to use
  - Strongly disagree
  - Disagree
  - Neutral
  - Agree
  - Strongly agree
  
2. Zoom software for the video visit software was easy for me to use
  - Strongly disagree
  - Disagree
  - Neutral
  - Agree
  - Strongly agree
  
3. I did not encounter problems with the equipment or Zoom software
  - Strongly disagree
  - Disagree
  - Neutral
  - Agree
  - Strongly agree
  
4. Patients did not encounter problems with the Zoom software
  - Strongly disagree
  - Disagree
  - Neutral
  - Agree
  - Strongly agree
  
5. Video visits could be a convenient platform to follow-up with patients after hospital discharge
  - Strongly disagree
  - Disagree
  - Neutral
  - Agree
  - Strongly agree

### **Further Feedback**

Would you like someone from the PEARL team to contact you for additional feedback?

- No
- Yes → provide email address: \_\_\_\_\_

Thank you for providing feedback on the PEARL initiative.

Supplementary Table 1: Characteristics of HM-APPs

| Characteristics                                                            | <b>N = 15</b><br>no. (%) |
|----------------------------------------------------------------------------|--------------------------|
| Age <40 years                                                              | 11 (73.3)                |
| <b>Gender</b>                                                              |                          |
| Women                                                                      | 13 (86.7)                |
| Men                                                                        | 2 (13.3)                 |
| <b>Current role</b>                                                        |                          |
| Nurse Practitioner                                                         | 10 (66.7)                |
| Physician Assistant                                                        | 5 (33.3)                 |
| <b>Number of years worked as Nurse Practitioner or Physician Assistant</b> |                          |
| 0 – 5                                                                      | 6 (40.0)                 |
| 6 – 15                                                                     | 7 (46.7)                 |
| >15 years                                                                  | 2 (13.3)                 |
| <b>Number of PEARL shifts completed*</b>                                   |                          |
| 1 – 5                                                                      | 10 (66.7)                |
| 6 – 15                                                                     | 5 (33.3)                 |
| >15                                                                        | 0 (0)                    |
| <b>Number of video visits completed</b>                                    |                          |
| 1 – 5                                                                      | 8 (53.3)                 |
| 6 – 15                                                                     | 6 (40.0)                 |
| >15                                                                        | 1 (6.7)                  |

\*Shifts ranged from 4–10 hours.

Abbreviations: HM-APP: Hospital Medicine Advanced Practice Provider;  
PEARL Post-discharge Early Assessment with Remote video Link



Supplementary Table 2: HM-APP Perspective on Video visits

|                                                                          | <b>Agree</b> | <b>Neutral</b> | <b>Disagree</b> |
|--------------------------------------------------------------------------|--------------|----------------|-----------------|
| <b>HM-APPs (n=15)</b>                                                    | no. (%)      |                |                 |
| <b>Interpersonal Communication</b>                                       |              |                |                 |
| I was engaged with patient during video visit                            | 15 (100)     | 0              | 0               |
| Patients were engaged during video visit                                 | 15 (100)     | 0              | 0               |
| I benefited from visual contact with patients                            | 11 (73.3)    | 2 (13.3)       | 2 (13.3)        |
| Video visit felt as personal as in-person visit                          | 6 (40.0)     | 3 (20.0)       | 6 (40.0)        |
|                                                                          |              |                |                 |
| <b>Technical Quality of Care</b>                                         |              |                |                 |
| Patient privacy was protected                                            | 13 (86.7)    | 2 (13.3)       | 0               |
| I discussed the discharge plan                                           | 13 (86.7)    | 2 (13.3)       | 0               |
| Video visit was a valuable addition to patient care                      | 8 (53.3)     | 7 (46.7)       | 0               |
| I provided value and input into the discharge plan                       | 5 (33.3)     | 9 (60.0)       | 1 (6.7)         |
| Time for video visit was sufficient                                      | 14 (93.3)    | 1 (6.7)        | 0               |
|                                                                          |              |                |                 |
| <b>Efficacy</b>                                                          |              |                |                 |
| Video visits increase access to care                                     | 13 (86.7)    | 2 (13.3)       | 0               |
| Video visits decrease emergency department visits                        | 6 (40.0)     | 7 (46.7)       | 2 (13.3)        |
| Video visits decrease length of stay                                     | 6 (40.0)     | 8 (53.3)       | 1 (6.7)         |
| Video visits decrease hospital readmission rates                         | 6 (40.0)     | 8 (53.3)       | 1 (6.7)         |
| Video visits provide ease of mind to patients and caregivers             | 15 (100)     | 0              | 0               |
|                                                                          |              |                |                 |
| <b>Technology</b>                                                        |              |                |                 |
| Video visit equipment was easy to use                                    | 12 (80.0)    | 1 (6.7)        | 2 (13.3)        |
| Video visit software was easy to use                                     | 12 (80.0)    | 1 (6.7)        | 2 (13.3)        |
| I did not encounter problems with equipment or software                  | 9 (60.0)     | 1 (6.7)        | 5 (33.3)        |
| Patients did not encounter problems with equipment or software           | 3 (20.0)     | 5 (33.3)       | 7 (46.7)        |
| Video visits are a convenient platform for post-discharge follow-up care | 12 (80.0)    | 3 (20.0)       | 0               |

Survey questions in Supplement 3. HM-APP characteristics in Supplementary Table 1.

Responses on 5-point Likert scale were collapsed into three categories: agree (strongly agree or agree), neutral, and disagree (disagree or strongly disagree).

Abbreviation: HM-APP: Hospital Medicine Advanced Practice Provider
